# Supplementary material
Source: ML conference proceedings conference paper supplement (https://openaccess.thecvf.com/content/CVPR2024/html/Ni_TI2V-Zero_Zero-Shot_Image_CVPR_2024_paper.html)
Supplement: Supplementary file 1 [file Ni_TI2V-Zero_Zero-Shot_Image_CVPR_2024_supplemental.zip]

Archive with 12 entries (12 files):
- 1-mug.mp4
- 2-ucf.mp4
- 3-open.mp4
- 4-ablation.mp4
- 5-long_video.mp4
- __MACOSX/._5-long_video.mp4
- 6-prediction.mp4
- 7-motivation.mp4
- __MACOSX/._7-motivation.mp4
- 8-intricate.mp4
- readme.pdf
- __MACOSX/._readme.pdf
